# Supplementary material for: Dietary Heterogeneity among Western Industrialized Countries Reflected in the Stable Isotope Ratios of Human Hair
Source: PubMed Central journal article supplement (PMC3316624; doi:10.1371/journal.pone.0034234), 2012-03-30
Supplement: pone.0034234.s001.pdf [file pone.0034234.s001.pdf]

| <b>Country</b> | <b>City</b>              | <b>Latitude (° N)</b> | <b>Longitude (° E)</b> | <b>Population</b> |
|----------------|--------------------------|-----------------------|------------------------|-------------------|
| Belgium        | Brussels                 | 50.833                | 4.333                  | 1830000           |
| Belgium        | Ghent                    | 51.050                | 3.717                  | 243366            |
| Denmark        | Aarhus                   | 56.150                | 10.217                 | 249709            |
| Denmark        | Randers                  | 56.467                | 10.050                 | 60656             |
| England        | London                   | 51.500                | -0.117                 | 7825200           |
| England        | Mansfield                | 53.133                | -1.200                 | 67885             |
| England        | Norwich                  | 52.633                | 1.300                  | 259100            |
| England        | Sheffield                | 53.369                | -1.540                 | 555500            |
| England        | York                     | 53.967                | -1.083                 | 202400            |
| Finland        | Heinola                  | 61.217                | 26.033                 | 20259             |
| Finland        | Helsinki                 | 60.176                | 24.934                 | 588941            |
| France         | Bellegarde-sur-Valserine | 46.100                | 5.817                  | 11404             |
| France         | Blois                    | 47.591                | 1.335                  | 47854             |
| France         | Bordeaux                 | 44.420                | -0.431                 | 235891            |
| France         | Castets                  | 43.883                | -1.147                 | 1885              |
| France         | Chalon-sur-Saone         | 46.783                | 4.850                  | 48376             |
| France         | Chamonix                 | 45.917                | 6.867                  | 9514              |
| France         | Charny                   | 47.883                | 3.100                  | 1716              |
| France         | Chedde                   | 45.933                | 6.717                  | 10996             |
| France         | La Rochelle              | 46.164                | -1.152                 | 75822             |
| France         | Laleu                    | 46.169                | -1.200                 | 90575             |
| France         | Mirambeau                | 45.373                | -0.571                 | 1486              |
| France         | Orleans                  | 47.930                | 1.896                  | 116490            |
| France         | Paris                    | 48.867                | 2.333                  | 12089098          |
| Germany        | Bad Aibling              | 47.867                | 12.000                 | 18272             |
| Germany        | Jena                     | 50.933                | 11.583                 | 105129            |
| Germany        | Oberappersdorf           | 48.500                | 11.800                 | 4271              |
| Greece         | Agios Konstantinos       | 38.758                | 22.830                 | 3410              |
| Greece         | Litochoro                | 40.104                | 22.500                 | 7011              |
| Greece         | Mytilini                 | 39.110                | 26.555                 | 36196             |
| Greece         | Patras                   | 38.244                | 21.734                 | 202757            |
| Greece         | Thessaloniki             | 40.635                | 22.936                 | 1006730           |
| Italy          | Aosta                    | 45.733                | 7.333                  | 35061             |
| Italy          | Courmayeur               | 45.783                | 6.967                  | 2870              |
| Italy          | Florence                 | 43.767                | 11.250                 | 370702            |
| Italy          | Prato                    | 43.883                | 11.100                 | 186710            |
| Italy          | Rome                     | 41.900                | 12.483                 | 2761477           |
| Italy          | San Ginesio              | 43.100                | 13.317                 | 3872              |
| Italy          | Taranto                  | 40.476                | 17.300                 | 191810            |
| Italy          | Terni                    | 42.567                | 12.617                 | 112253            |
| Italy          | Viterbo                  | 42.417                | 12.100                 | 63597             |

| <b>Country</b> | <b>City</b>      | <b>Latitude (° N)</b> | <b>Longitude (° E)</b> | <b>Population</b> |
|----------------|------------------|-----------------------|------------------------|-------------------|
| Malta          | Dingli           | 35.861                | 14.382                 | 3347              |
| Netherlands    | Voorschoten      | 52.133                | 4.450                  | 22783             |
| Portugal       | Almada           | 38.900                | -9.000                 | 101500            |
| Spain          | Albatera         | 38.183                | -0.867                 | 11656             |
| Spain          | Benicassim       | 40.050                | 0.067                  | 18098             |
| Spain          | Bilbao           | 43.258                | -2.914                 | 875552            |
| Spain          | Cangas de Onis   | 43.350                | -5.117                 | 6731              |
| Spain          | Castro-Urdiales  | 43.373                | -3.214                 | 32258             |
| Spain          | Granada          | 37.183                | -3.600                 | 237929            |
| Spain          | Hostalric        | 41.750                | 2.633                  | 3998              |
| Spain          | Jaen             | 37.767                | -3.783                 | 120021            |
| Spain          | Leon             | 42.600                | -5.567                 | 206011            |
| Spain          | Medina del Campo | 41.300                | -4.917                 | 21540             |
| Spain          | Toledo           | 39.867                | -4.017                 | 82489             |
| Spain          | Torredembarra    | 41.150                | 1.400                  | 15406             |
| Spain          | Valdepeñas       | 38.767                | -3.383                 | 31147             |
| Spain          | Velez Rubio      | 37.650                | -2.067                 | 7138              |
| Spain          | Zarautz          | 43.281                | -2.168                 | 22812             |
| Switzerland    | Brugg            | 47.117                | 7.283                  | 10408             |
| Switzerland    | Schaffhausen     | 47.700                | 8.633                  | 34943             |
| Switzerland    | Wallisellen      | 47.477                | 8.583                  | 13616             |
| Switzerland    | Zurich           | 47.367                | 8.550                  | 372047            |

*All population data from Wikipedia.org*
